# Supplementary material for: Triptolide Induces Liver Injury by Regulating Macrophage Recruitment and Polarization via the Nrf2 Signaling Pathway
Source: Hindawi journal article supplement (doi:10.1155/2022/1492239), 2022-01-01
Supplement: f1 [file 1492239.f1.pdf]

**Table 1** Primer sequences

| <b>Gene</b>    | <b>Primer</b> | <b>Sequence (5' to 3')</b>        |
|----------------|---------------|-----------------------------------|
| HPRT1          | Forward       | CAG ACT TTG TTG GAT TTG AAA       |
|                | Reserve       | GCT CAT CTT AGG CTT TGT AT        |
| F4/80          | Forward       | CTT TGG CTA TGG GCT TCC AGT C     |
|                | Reserve       | GGC AAG GAG GAC AGA GTT TAT CGT G |
| CD68           | Forward       | GCC CGA GTA CAG TCT ACC TGG       |
|                | Reserve       | AGA GAT GAA TTC TGC GCC AT        |
| CD11b          | Forward       | CGG TAG CAT CAA CAA CAT           |
|                | Reserve       | GCA TCA AAG AGA ACA AGG T         |
| IL-1 $\beta$   | Forward       | AAT CTC ACA GCA GCA CAT C         |
|                | Reserve       | AGC AGG TTA TCA TCA TCA TCC       |
| TNF- $\alpha$  | Forward       | GCC TCC CTC TCA TCA GTT C         |
|                | Reserve       | ACT TGG TGG TTT GCT ACG           |
| MCP-1          | Forward       | TCC ACA ACC ACC TCA AGC ACT TC    |
|                | Reserve       | GGC ATC ACA GTC CGA GTC ACA C     |
| IL-12p40       | Forward       | GGA AGC ACG GCA GCA GAA TA        |
|                | Reserve       | AAC TTG AGG GAG AAG TAG GAA TGG   |
| CCL17          | Forward       | AGT GCT GCC TGG ATT ACT TCA AAG   |
|                | Reserve       | CTG GAC AGT CAG AAA CAC GAT GG    |
| CCL22          | Forward       | TAA CAT CAT GGC TAC CCT GCG       |
|                | Reserve       | TGT CTT CCA CAT TGG CAC CA        |
| TGF- $\beta$ 1 | Forward       | ACC AAG GAG ACG GAA TAC           |
|                | Reserve       | TGT GGA GCT GAA GCA ATA           |
| CD86           | Forward       | ACG TAT TGG AAG GAG ATT ACA GCT   |
|                | Reserve       | TCT GTC AGC GTT ACT ATC CCG C     |
| iNOS           | Forward       | GCC ACC AAC AAT GGC AAC A         |
|                | Reserve       | CGT ACC GGA TGA GCT GTG AAT T     |
| IL-6           | Forward       | TCT GAA GGA CTC TGG CTT TG        |
|                | Reserve       | GAT GGA TGC TAC CAA ACT GGA       |
| CD206          | Forward       | GGC TTC CGT CAC CCT GTA TGC       |
|                | Reserve       | ACC TTC CAT CTG CTC CAC AAT CC    |
| Nrf2           | Forward       | ATATCCCCAGCCACGCTGAAA             |
|                | Reserve       | CTTGCTCCATGTCCTGCTCTAT            |
| NQO1           | Forward       | GCTGCAGACCTGGTGATATT              |
|                | Reserve       | ACTCTCTCAAACCAGCCTTT              |
| CCL24          | Forward       | GCA GCA TCT GTC CCA AGG           |
|                | Reserve       | GCA GCT TGG GGT CAG TAC A         |
| FIZZL          | Forward       | CCA ATC CAG CTA ACT ATC CCT CC    |
|                | Reserve       | CCA GTC AAC GAG TAA GCA CAG       |
| CHI313         | Forward       | TCA CTT ACA CAC ATG AGC AAG AC    |
|                | Reserve       | CGG TTC TGA GGA GTA GAG ACC A     |

**Table 2** Information of antibodies

| <b>Antibody</b>                                               | <b>Information</b>                  |
|---------------------------------------------------------------|-------------------------------------|
| APC anti-mouse CD45 Antibody                                  | BioLegend, 103112                   |
| PE anti-mouse F4/80                                           | BioLegend, 123110                   |
| Alexa Fluor® 647 anti-mouse F4/80                             | BioLegend, 123140                   |
| FITC anti-mouse/human CD11b                                   | BioLegend, 101206                   |
| PerCP/Cy5.5 anti-mouse CD68 Antibody                          | BioLegend, 137010                   |
| PerCP/Cy5.5 anti-mouse CD86 Antibody                          | BioLegend, 105028                   |
| PerCP/Cy5.5 anti-mouse CD206 Antibody                         | BioLegend, 141716                   |
| Antibody against Phospho-p44/42 MAPK (Erk1/2) (Thr202/Tyr204) | Cell Signaling Technology, 4370     |
| Antibody against p44/42 MAPK (Erk1/2)                         | Cell Signaling Technology , 4695    |
| Antibody against Phospho-Akt (Ser473)                         | Cell Signaling Technology , 4060    |
| Antibody against NRF2                                         | Proteintech, 16396-1-AP             |
| Antibody against Lamin B                                      | Santa Cruz Biotechnology, sc-6216   |
| Antibody against GAPDH                                        | Santa Cruz Biotechnology, sc-365062 |
